# Supplementary material for: Flour Treatments Affect Gluten Protein Extractability, Secondary Structure, and Antibody Reactivity
Source: Preprints.org preprint supplement (doi:10.20944/preprints202409.1481.v1), 2024-09-19
Supplement: Supplementary file 1 [file supplementary]

| (a)  SG  PB |   SG  PB |
| --- | --- |
| (b)  SG |   SG |
| (c) |   SG |
|  (d) |  |

**Figure 1.**  Microstructures of wheat flour before and after different treatments in two different magnitudes. (a)= Untreated Flour; (b) = Microwave; (c) = Oven, and (d) = Extrusion. Arrows in the micrographs indicate starch granules (SG), and protein bodies (PB) in the sample.
